1 ***Methanosarcina acetivorans* simultaneously produces molybdenum, vanadium, and iron-**  
2 **only nitrogenases in response to fixed nitrogen and molybdenum depletion**

3

4 Melissa Chanderban<sup>a</sup>, Christopher A. Hill<sup>a</sup>, Ahmed E. Dhamad<sup>a,b</sup> and Daniel J. Lessner<sup>a#</sup>

5

6 <sup>a</sup>Department of Biological Sciences, University of Arkansas-Fayetteville, Fayetteville, Arkansas,

7 USA. <sup>b</sup>Department of Biological Sciences, Wasit University, Wasit, Iraq.

8

9 Running Head: Nitrogenase expression in *Methanosarcina acetivorans*.

10

11 #Address correspondence to Daniel J. Lessner, [dlessner@uark.edu](mailto:dlessner@uark.edu)

12

13

14

15 **ABSTRACT**

16 All nitrogen-fixing bacteria and archaea (diazotrophs) use molybdenum (Mo) nitrogenase to  
17 reduce dinitrogen (N<sub>2</sub>) to ammonia. Some diazotrophs also contain alternative nitrogenases that  
18 lack Mo: vanadium (V) and iron-only (Fe) nitrogenases. Among diazotrophs, the regulation and  
19 usage of the alternative nitrogenases in methanogens is largely unknown. *Methanosarcina*  
20 *acetivorans* contains *nif*, *vnf*, and *anf* gene clusters encoding putative Mo-, V-, and Fe-  
21 nitrogenases, respectively. This study investigated the effect of fixed nitrogen and Mo/V  
22 availability on nitrogenase expression and growth by *M. acetivorans*. The availability of Mo and  
23 V did not affect growth of *M. acetivorans* with fixed nitrogen but significantly affected growth  
24 with N<sub>2</sub>. *M. acetivorans* exhibited the fastest growth rate and highest cell yield during growth  
25 with N<sub>2</sub> in medium containing Mo. Depletion of Mo (Fe-only condition) resulted in a significant  
26 decrease in growth rate and cell yield. The addition of V to Mo-depleted medium stimulated  
27 diazotrophic growth but was still less than growth in Mo-replete medium. qPCR analysis  
28 revealed transcription of the *nif* operon is only moderately affected by depletion of fixed nitrogen  
29 and Mo. However, *vnf* and *anf* transcription increased significantly when fixed nitrogen and Mo  
30 were depleted, with removal of Mo being the key factor. Immunoblot analysis revealed Mo-  
31 nitrogenase is produced when fixed nitrogen is depleted regardless of Mo availability, while V-  
32 and Fe-nitrogenases are produced only in the absence of fixed nitrogen and Mo. These results  
33 reveal that alternative nitrogenase production in *M. acetivorans* is tightly controlled and that all  
34 three nitrogenases can be simultaneously produced.

35

36

37

38 **IMPORTANCE**

39 Methanogens and closely related methanotrophs are the only archaea known or predicted to  
40 possess nitrogenase. As such, methanogens play critical roles in both the global biological  
41 nitrogen and carbon cycles. Moreover, methanogens are an ancient microbial lineage and  
42 nitrogenase likely originated in methanogens. An understanding of the usage and properties of  
43 nitrogenases in methanogens can provide new insight into the evolution of nitrogen fixation and  
44 aid in the development nitrogenase-based biotechnology. This study provides the first evidence  
45 that a methanogen can produce all three forms of nitrogenases, even simultaneously.  
46 Surprisingly, Mo-nitrogenase was produced in cells grown in the absence of Mo, indicating  
47 components of Mo-nitrogenase regulate or are needed to produce V- and Fe-nitrogenases in  
48 methanogens. The results provide a foundation to understanding the assembly, regulation, and  
49 activity of the alternative nitrogenases in methanogens.

50

51

52

## 53 INTRODUCTION

54           Microbes are the primary drivers of the global biological nitrogen (N) cycle [1, 2]. For  
55 example, only select bacteria and archaea are capable of biological nitrogen fixation, whereby  
56 dinitrogen gas (N<sub>2</sub>) is reduced to ammonia (NH<sub>3</sub>), the preferred “fixed” form of N used directly  
57 by most organisms. The biological reduction of the triple bond of N<sub>2</sub> is difficult and is catalyzed  
58 by nitrogenase, a unique metalloenzyme [3, 4]. To date, all known and predicted N<sub>2</sub>-fixing  
59 prokaryotes (diazotrophs) possess molybdenum (Mo) nitrogenase that contains a Mo atom within  
60 the unique iron (Fe) Mo-cofactor or M-cluster of the active site [5, 6]. Mo-nitrogenase consists  
61 of two components; the Fe protein, which contains a single iron-sulfur (Fe-S) cluster, and the  
62 MoFe protein that contains the active site FeMo-cofactor and the [8Fe-7S] P-cluster. The Fe  
63 protein, encoded by *nifH*, is the dinitrogenase reductase that donates electrons to the MoFe  
64 protein, the dinitrogenase composed of a heterotetramer of subunits encoded by *nifD* and *nifK*.  
65 Together NifH and NifDK catalyzes the energy intensive reduction of N<sub>2</sub> as shown: N<sub>2</sub> + 16ATP  
66 + 8e<sup>-</sup> + 8H<sup>+</sup> → 2NH<sub>3</sub> + H<sub>2</sub> + 16ADP + 16P<sub>i</sub> [7]. As such, Mo-nitrogenase production and activity  
67 is highly regulated in diazotrophs and is only synthesized when a fixed N source is unavailable.  
68 When needed, Mo-nitrogenase is produced in high quantities and can comprise as much as 10%  
69 of the total protein of the cell [8].

70           In addition to having Mo-nitrogenase, some diazotrophs possess alternative nitrogenases  
71 that lack Mo [9, 10]. The vanadium (V) nitrogenase and the Fe-only (Fe) nitrogenase contain an  
72 active site FeV-cofactor and FeFe-cofactor, respectively, instead of FeMo-cofactor [11, 12]. The  
73 understanding of the genetic, biochemical, and catalytic properties of the alternative nitrogenases  
74 has primarily come from a few model bacteria (e.g., *Azotobacter vinelandii*). V-nitrogenase and  
75 Fe-nitrogenase have a similar subunit composition as Mo-nitrogenase, comprised of

76 VnfH/VnfDK and AnfH/AnfDK subunits, respectively. However, a distinguishing feature of V-  
77 and Fe-nitrogenases is the presence of an additional subunit (G) that associates with the  
78 dinitrogenase component (i.e., VnfDGK and AnfDGK) [9, 11]. The precise role of the G subunit  
79 is unknown, but it is required for diazotrophy in the absence of Mo [13]. V- and Fe-nitrogenases  
80 are less efficient at reducing  $N_2$  than Mo-nitrogenase. More electron flux is directed to obligate  
81  $H_2$  production during reduction of  $N_2$  by the alternative nitrogenases leading to substantially  
82 more ATP consumption. The V- and Fe-nitrogenases are estimated to consume 24 ATPs and 40  
83 ATPs, respectively, during the reduction of a single  $N_2$  to  $2NH_3$  [14, 15]. As such, alternative  
84 nitrogenases in bacteria are only produced when insufficient levels of Mo are present to support  
85 usage of Mo-nitrogenase. In studied bacteria that possess all three nitrogenases, the expression  
86 and activity of each nitrogenase is highly regulated in response to metal and fixed N availability  
87 [9, 16].

88 In addition to  $N_2$ , nitrogenases from bacteria can reduce other double and triple-bonded  
89 substrates (e.g., CO,  $CO_2$ , acetylene). Moreover, in the absence of another substrate, nitrogenase  
90 reduces protons to  $H_2$ , a feature that has been exploited to use nitrogenase to produce  $H_2$  as a  
91 biofuel [17, 18]. The substrate, product, and activity profiles are also different between the three  
92 nitrogenases. The reduction of acetylene ( $C_2H_2$ ) to ethylene ( $C_2H_4$ ) is commonly used to measure  
93 nitrogenase activity [19]. Mo-nitrogenase reduces acetylene at a higher rate than both V- and Fe-  
94 nitrogenases, which also further reduce ethylene, producing ethane ( $C_2H_6$ ) as a minor product  
95 [20]. Mo-nitrogenase does not produce ethane. Moreover, bacterial V-nitrogenase is more adept  
96 at reducing CO to alkanes, and the Fe-nitrogenase is better at reducing  $CO_2$  to  $CH_4$  [11, 21-23].

97 In contrast to bacterial diazotrophs, the regulation, assembly, and activity of nitrogenase,  
98 especially the alternative nitrogenases, is largely unknown in archaeal diazotrophs. Among

99 archaea, only anaerobic methanogens and the closely related anaerobic methanotrophs are known  
100 or predicted to fix N<sub>2</sub> [5, 24, 25]. N<sub>2</sub> fixation has been studied in a few species of methanogens.  
101 The primary models are the obligate CO<sub>2</sub>-reducing methanogen *Methanococcus maripaludis*,  
102 and the more versatile species *Methanosarcina mazei* and *Methanosarcina barkeri* [26, 27].  
103 *Methanosarcina* species can grow using methylated compounds (e.g., methanol) and acetate, in  
104 addition to reducing CO<sub>2</sub> with H<sub>2</sub> [28]. *M. maripaludis* and *M. mazei* only contain Mo-  
105 nitrogenase, whereas strains of *M. barkeri* contain all three nitrogenases [29, 30]. Mo-dependent  
106 and V-dependent N<sub>2</sub> fixation has been demonstrated in *M. barkeri* [31-33]. To our knowledge,  
107 diazotrophy under Fe-only conditions using the Fe-nitrogenase has not been documented for any  
108 methanogen. Previous research has primarily focused on elucidating the mechanisms that  
109 regulate the production and activity of Mo-nitrogenase in methanogens, revealing that the  
110 regulatory proteins used to control transcription and activity of Mo-nitrogenase are distinct from  
111 those used by most bacteria [34, 35]. Recently, small RNAs (sRNA) have also been  
112 demonstrated to play roles in N<sub>2</sub> fixation and assimilation in methanogens [36, 37].

113 *Methanosarcina acetivorans* serves as an ideal model methanogen to understand the  
114 regulation and usage of the alternative nitrogenases in methanogens, since its genome encodes all  
115 three nitrogenases and it has a robust genetic system [38-41]. Recently, it was shown that *M.*  
116 *acetivorans* can fix N<sub>2</sub> using Mo-nitrogenase. Like *M. maripaludis*, *M. mazei*, and *M. barkeri*,  
117 Mo-nitrogenase is only produced in *M. acetivorans* when cells are grown in the absence of a  
118 fixed N source (e.g., NH<sub>4</sub>Cl). Silencing of the *nif* operon in *M. acetivorans* using the recently  
119 developed CRISPRi-dCas9 system confirmed that Mo-nitrogenase is required for diazotrophy  
120 when cells are supplied Mo [41]. However, to our knowledge, the ability of *M. acetivorans* to fix  
121 N<sub>2</sub> when Mo is not available has not been documented nor have the activities of *M. acetivorans*

122 V-nitrogenase or Fe-nitrogenase been reported. Presumably, *M. acetivorans* produces V-  
123 nitrogenase and/or Fe-nitrogenase when both fixed N and Mo are limiting. An understanding of  
124 the properties of nitrogenases from methanogens could lead to new avenues for nitrogenase-  
125 based biofuel production and for the genetic engineering of crop plants capable of N<sub>2</sub>-fixation. In  
126 this study we show that *M. acetivorans* can grow by fixing N<sub>2</sub> in the absence of Mo with  
127 production of both V- and Fe-nitrogenases. These results provide a foundation to understand the  
128 regulation and properties of the three nitrogenases in methanogens.

129

## 130 **RESULTS**

### 131 **Organization of nitrogenase genes in *M. acetivorans* and prevalence of alternative**

132 **nitrogenases in methanogens.** The genome of *M. acetivorans* contains three separate  
133 nitrogenase gene clusters (**Fig. 1**), designated *nif*, *vnf*, and *anf*, encoding putative Mo-  
134 nitrogenase, V-nitrogenase, and Fe-nitrogenase, respectively. The gene arrangement of the *nif*  
135 cluster is similar to the characterized *nif* operons from *M. maripaludis*, *M. barkeri*, and *M. mazei*  
136 [30, 42, 43]. In addition to encoding the nitrogenase structural components (NifH and NifDK),  
137 the operon also encodes the regulatory proteins NifI<sub>1</sub> and NifI<sub>2</sub> and the FeMo-cofactor scaffold  
138 proteins NifEN [12, 44]. The *M. acetivorans vnf* cluster contains the same gene arrangement as  
139 *nif*, including its own regulatory and scaffold genes, but also includes *vnfG* and a homolog of  
140 *nifX*, designated *vnfX*. NifX is involved in FeMo-cofactor assembly in bacteria [12]. The gene  
141 arrangement of the *M. acetivorans anf* cluster is like the *vnf* cluster, except *anfH* encoding the  
142 putative Fe-protein is located divergent and downstream of *anfK*. The *anf* and *vnf* gene clusters  
143 are divergent in the chromosome of *M. acetivorans* (**Fig. 1**), indicating there could be  
144 coordinated regulation. Interestingly, the amino acid sequences of VnfH and AnfH are identical,

145 indicating the same Fe-protein functions with both V- and Fe-nitrogenases. Also unique to the  
146 *anf* cluster is the presence of homologs of Anf3 and AnfO found in *anf* operons of bacteria. The  
147 precise functions of Anf3 and AnfO are unknown. Anf3 is essential for diazotrophy with the Fe-  
148 nitrogenase in *Rhodobacter capsulatus* [45]. An Anf3 homolog characterized in *A. vinelandii* is a  
149 heme- and FAD-binding oxidase that may protect the Fe-nitrogenase from oxygen [46].

150         The *nif*, *vnf*, and *anf* gene clusters are widely distributed within genera of bacteria.  
151 However, nitrogenase genes are found only in a subset of archaea, restricted to methanogens and  
152 closely related anaerobic methanotrophs. The *nif* operon is distributed across six of the seven  
153 orders of methanogens, whereas the *vnf* and *anf* genes are restricted to the Methanosarcinales,  
154 with few exceptions, namely *Methanobacterium lacus*, which contains a putative *anf* gene cluster  
155 [5, 24, 25]. Like bacteria, all methanogens that contain putative *vnf* and *anf* clusters also contain  
156 the *nif* operon. Of the 41 complete Methanosarcinales genome sequences currently available in  
157 the NCBI database, ~ 66 % contain the *nif* genes. Of those containing *nif*, ~ 44 % contain the *vnf*  
158 and/or *anf* genes (**Table 1**). The arrangement of the *vnf* and *anf* gene clusters are similar across  
159 the Methanosarcinales (**Fig. S1**). Of note is a hypothetical protein encoded by a gene between  
160 *vnfDGK* and *vnfEN* in several *Methanosarcina* species.

161  
162 **Molybdenum and vanadium availability affect diazotrophic growth of *M. acetivorans*.** To  
163 ascertain the effect of molybdenum and vanadium availability on nitrogenase utilization by *M.*  
164 *acetivorans*, the pseudo-wild-type strain WWM73 (used for genetic analysis) [40] was passed in  
165 HS standard medium lacking Mo for >100 generations to deplete molybdate, the biological  
166 available form of Mo. Vanadium is not present in standard HS medium. Mo-deplete cells were  
167 used to inoculate Mo-deplete HS medium devoid of NH<sub>4</sub>Cl (fixed N source). Methanol was used



168 as the carbon and energy source in all experiments. Molybdate, vanadate, and NH<sub>4</sub>Cl were added  
169 from sterile anaerobic stocks to separate cultures to compare the effect of Mo, V, and fixed N on  
170 growth and nitrogenase expression. Neither the depletion of Mo nor the addition of V affects the  
171 growth profile, generation time, or cell yield when NH<sub>4</sub>Cl is supplied as the fixed N source (**Fig.**  
172 **2 and Table 2**). However, the depletion of Mo and the addition of V significantly affects the  
173 growth profile, generation time and cell yield in cultures without NH<sub>4</sub>Cl (diazotrophic). When *M.*  
174 *acetivorans* is provided Mo in the absence of NH<sub>4</sub>Cl, the generation time increases  
175 approximately 3-fold, and the cell yield decreases approximately 37% compared to non-  
176 diazotrophic cultures (**Table 2**). Diazotrophic cultures lacking Mo but provided V have an even  
177 longer generation time and further reduction in cell yield (~50% that of non-diazotrophic  
178 cultures). Diazotrophic growth is further impacted by the absence of both Mo and V, with an  
179 ~10-fold increase in generation time and an ~70 % reduction in cell yield compared to non-  
180 diazotrophic cultures (**Fig. 2 and Table 2**). Diazotrophic cultures lacking Mo also have an  
181 extended lag phase compared to diazotrophic cultures containing Mo (**Fig. 2 and Table 2**).  
182 These data reveal that *M. acetivorans* is capable of diazotrophy in the absence of Mo, and that V  
183 availability impacts N<sub>2</sub> fixation. These results are consistent with *M. acetivorans* utilizing Mo-,  
184 V-, and Fe-nitrogenases to fix N<sub>2</sub> according to Mo and V availability.

185

186 **Methylotrophic methanogenesis is not altered by diazotrophy or the availability of**  
187 **molybdenum or vanadium.** Growth of *M. acetivorans* with methanol utilizes the  
188 methylotrophic pathway of methanogenesis, where one methyl group of methanol is oxidized to  
189 CO<sub>2</sub>, and the resulting three electron pairs are used to reduce three additional methyl groups to  
190 CH<sub>4</sub> [47]. To determine if diazotrophy and metal availability affect the flux of carbon during

191 methylotrophic methanogenesis, contributing to the slower growth rate and lower cell yields in  
192 the absence of Mo, total CH<sub>4</sub> was determined after the cessation of growth of non-diazotrophic  
193 and diazotrophic cultures. Similar amounts of CH<sub>4</sub> were observed across all growth conditions  
194 (**Table 3**), revealing N<sub>2</sub> fixation and differences in Mo and V availability does not significantly  
195 alter the flux of carbon during methylotrophic methanogenesis. Therefore, the observed  
196 hierarchical decrease in cell yields during diazotrophic growth under Mo + Fe, V + Fe, or Fe-  
197 only conditions (**Table 2**) is not due to decreased energy availability from altered  
198 methanogenesis but is likely due to the increased ATP consumption needed to support N<sub>2</sub>  
199 reduction by Mo-, V-, and Fe-nitrogenases, as seen in bacteria [9].

200

201 **Molybdenum availability affects the expression of V-nitrogenase and Fe-nitrogenase but**  
202 **not Mo-nitrogenase in *M. acetivorans*.** Previous results demonstrated that Mo-nitrogenase is  
203 not produced in *M. acetivorans* cells grown in the presence of NH<sub>4</sub>Cl. Removal of NH<sub>4</sub>Cl results  
204 in a modest increase in *nif* transcription and production of Mo-nitrogenase, allowing growth with  
205 N<sub>2</sub>. Repression of the *nif* operon by dCas9 abolished the ability to grow with N<sub>2</sub> in medium  
206 containing Mo [41]. To determine the effect of fixed N and Mo depletion on Mo-nitrogenase, V-  
207 nitrogenase and Fe-nitrogenase expression, qPCR was performed using primers specific for *nifD*,  
208 *vnfD*, and *anfD* (**Table S1**) to analyze transcript abundance in cells grown in medium with or  
209 without NH<sub>4</sub>Cl and containing Mo + Fe, V + Fe, or Fe only (**Fig. 3**). An increase in transcript  
210 abundance for *nifD* and *vnfD* was observed in cells grown in Mo + Fe medium without NH<sub>4</sub>Cl,  
211 relative to the transcript abundance in cells grown with NH<sub>4</sub>Cl (**Fig. 3A**). However, only the fold  
212 change for *vnfD* was significant. Comparison of *nifD*, *vnfD*, *anfD* transcript abundance from cells  
213 grown with V + Fe showed a significant fold change for *vnfD* and *anfD* (**Fig. 3B**). The transcript

214 abundance of *vnfD* is ~180-fold higher in cells grown in V + Fe medium without NH<sub>4</sub>Cl  
215 compared to cells grown with NH<sub>4</sub>Cl. Transcript abundance for *anfD* is ~60-fold higher in cells  
216 grown in V + Fe medium without NH<sub>4</sub>Cl compared to cells grown with NH<sub>4</sub>Cl. In contrast, only  
217 a slight increase (~3-fold) was observed for *nifD* transcript abundance. Like the transcript  
218 abundance of *vnfD* and *anfD* in cells grown with V + Fe, cells grown in Fe-only medium lacking  
219 NH<sub>4</sub>Cl had a significant increase in *vnfD* and *anfD* transcript abundance compared to cells grown  
220 with NH<sub>4</sub>Cl (**Fig. 3C**). No change in the expression of *nifD* was detected in cells grown in Fe-  
221 only medium lacking NH<sub>4</sub>Cl relative to that with NH<sub>4</sub>Cl (**Fig. 3C**).

222 To further determine the effect of Mo removal on transcription of each nitrogenase gene  
223 cluster, the fold change in *nifD*, *vnfD* and *anfD* transcript abundance was also calculated by  
224 comparing the relative abundance in cells grown in V + Fe or Fe-only medium to the transcript  
225 abundance in cells grown in Mo + Fe medium (**Fig. 4**). The expression of *nifD* did not  
226 significantly change in cells grown in medium with or without Mo, regardless of the presence or  
227 absence of NH<sub>4</sub>Cl (**Fig. 4A**). However, removal of Mo significantly affected the transcription of  
228 both *vnfD* and *anfD* in cells grown with or without NH<sub>4</sub>Cl (**Fig. 4B-C**). The transcript abundance  
229 of *vnfD* is highest in cells grown in Fe-only medium, with the fold-change higher than when V is  
230 present. A similar pattern was observed for the expression of *anfD*. However, the fold change in  
231 expression of *anfD* in cells grown with Fe only compared to Mo + Fe was much higher (~300-  
232 600-fold). These results indicate there is significant regulatory control of transcription of the *vnf*  
233 and *anf* gene clusters, whereas there is only modest transcriptional control of the *nif* operon. The  
234 results also show that the depletion of Mo is the key signal that increases transcription of the *vnf*  
235 and *anf* gene clusters. Removal of a fixed N source (NH<sub>4</sub>Cl) when Mo is available has only a  
236 slight effect on the transcription of the *vnf* and *anf* gene clusters (**Fig. 3A**).

237           The production of Mo-, V-, and Fe-nitrogenases in *M. acetivorans* grown under the same  
238 conditions for qPCR analysis was determined by Western blot using antibodies specific to NifD,  
239 VnfD, and AnfD (**Fig. 5**). Consistent with previous results [41], NifD was only detected in lysate  
240 from *M. acetivorans* cells grown in Mo + Fe medium lacking NH<sub>4</sub>Cl. Neither VnfD nor AnfD  
241 were detected in lysate from cells grown in Mo + Fe medium regardless of the presence or  
242 absence of NH<sub>4</sub>Cl. However, both VnfD and AnfD were detected in lysate from cells grown in  
243 Mo-depleted medium lacking NH<sub>4</sub>Cl. Interestingly, NifD was also detected in lysate from cells  
244 grown in Mo-deplete medium. The availability of V does not appear to affect production of  
245 VnfD or AnfD. These results indicate that both the depletion of fixed N and Mo are required for  
246 production of V-nitrogenase and Fe-nitrogenase in *M. acetivorans*.

247

## 248 **DISCUSSION**

249           The regulation, assembly, and activity of the three forms of nitrogenase is well  
250 understood in diazotrophic bacteria, especially in the principal model *A. vinelandii* that contains  
251 all three nitrogenases. *A. vinelandii* is an obligate aerobe; thus, in addition to nitrogenase  
252 structural proteins, *A. vinelandii* requires accessory proteins to prevent oxidative damage to  
253 nitrogenase and to integrate nitrogen fixation into central metabolism. At least 82 genes are  
254 predicted to be involved in the formation and regulation of Mo-, V-, and Fe-nitrogenases in *A.*  
255 *vinelandii* [16]. Moreover, there is complex regulatory control over hierarchal nitrogenase  
256 expression, with only one nitrogenase produced at a time. When fixed N is absent and Mo is  
257 available, Mo-nitrogenase is preferentially produced over V- and Fe-nitrogenase, followed by V-  
258 nitrogenase if Mo is absent and V is present. If neither Mo nor V is available, then Fe-  
259 nitrogenase is produced [24]. Among methanogens, the alternative nitrogenases are restricted

260 primarily to the Methanosarcinales, the most metabolically diverse methanogens with the largest  
261 genomes. Nonetheless, the genomes of sequenced Methanosarcinales contain simpler  
262 nitrogenase gene clusters and lack many of the accessory and regulatory proteins found in *A.*  
263 *vinelandii* and other diazotrophic bacteria [25]. The formation and regulation of the alternative  
264 nitrogenases is likely simpler in methanogens compared to aerobic diazotrophic bacteria. The  
265 results presented here demonstrate that *M. acetivorans* produces all three nitrogenases and is  
266 capable of diazotrophy in the absence of available Mo and V (Fe-only condition). To our  
267 knowledge, this is first direct evidence of a methanogen producing an Fe-nitrogenase and  
268 capable of diazotrophy in the absence of Mo or V.

269 Like other diazotrophs, *M. acetivorans* only produces nitrogenase in the absence of fixed  
270 N. The diazotrophic growth profiles of *M. acetivorans* correlate with reported ATP requirements  
271 by Mo-, V-, and Fe-nitrogenase from bacteria [14]. *M. acetivorans* has the fastest growth rate  
272 and highest cell yield during diazotrophic growth when utilizing only Mo-nitrogenase. Only a  
273 modest increase in transcription of the *nif* operon was observed in response to fixed N depletion.  
274 The high basal level of transcription of the *nif* operon likely allows *M. acetivorans* to be poised  
275 for rapid Mo-nitrogenase production. The relatively short lag time before the onset of  
276 diazotrophic growth in Mo + Fe medium (**Table 2** and **Fig. 2**) supports the rapid production of  
277 Mo-nitrogenase.

278 The results indicating minimal transcriptional control of the *nif* operon further support  
279 that post-transcriptional regulation is a key factor controlling Mo-nitrogenase production.  
280 Previous studies investigated the role of NrpR in regulating the expression of Mo-nitrogenase in  
281 *M. acetivorans*. NrpR is the repressor of the *nif* operon in methanogens and indirectly senses  
282 fixed N availability by directly sensing intracellular 2-oxoglutarate levels [48]. A mutant strain

283 of *M. acetivorans* where *nrpR* transcription was silenced using the CRISPRi-dCas9 system  
284 revealed that the depletion of NrpR results in an increase in the transcription of the *nif* operon,  
285 but the mutant still fails to produce detectable nitrogenase when grown with fixed N [41]. In  
286 *Methanosarcina mazei*, a small RNA (sRNA<sub>154</sub>) is exclusively expressed when fixed N is  
287 limiting and functions to stabilize the polycistronic mRNA produced from the *nif* operon [36].  
288 The genome of *M. acetivorans* encodes a sRNA<sub>154</sub> homolog, indicating similar post-  
289 transcriptional regulation of the *nif* operon. Interestingly, removal of Mo did not significantly  
290 alter transcription of the *nif* operon or the production of nitrogenase (**Fig. 4A and 5**). Therefore,  
291 the critical and likely only signal for Mo-nitrogenase production in *M. acetivorans* is fixed N  
292 limitation. This is distinct from diazotrophic bacteria that contain V- and Fe-nitrogenases. For  
293 example, *A. vinelandii* and the purple non-sulfur phototroph *Rhodospseudomonas palustris* both  
294 stop producing Mo-nitrogenase when Mo is depleted [24, 49].

295 While Mo-depletion had little effect on Mo-nitrogenase expression, it is critical for the  
296 expression of V- and Fe-nitrogenase in *M. acetivorans*. Both fixed N and Mo depletion are  
297 required for production of V-nitrogenase and Fe-nitrogenase (**Fig. 5**). Importantly, Mo depletion  
298 resulted in a significant increase in the relative transcript abundance of *vnfD* and *anfD* (**Fig. 3**  
299 **and 4**). Thus, unlike production of Mo-nitrogenase, transcriptional regulation is a key  
300 mechanism to control production of V- and Fe-nitrogenases in *M. acetivorans*. The overall  
301 transcript abundance profiles for *vnfD* and *anfD* are similar across all growth conditions. Mo  
302 depletion appears to be a key effector as cells grown with NH<sub>4</sub>Cl exhibited a significant increase  
303 in transcript abundance of *vnfD* and *anfD* (**Fig. 4**). Nonetheless, neither VnfD nor AnfD were  
304 detected in cells grown with NH<sub>4</sub>Cl in Mo-depleted medium (**Fig. 5**), indicating post-  
305 transcriptional regulation of *vnf* and *anf* genes is also likely involved. Unexpectedly, in the

306 absence of Mo, the presence of V does not increase the transcript abundance of *vnfD* and *anfD* as  
307 much as the increase during Fe-only conditions (**Fig. 4**). The role V plays in nitrogenase  
308 regulation is unknown in most diazotrophs. Nevertheless, when comparing the effect of fixed N  
309 depletion, a large relative fold change in transcript abundance for *vnfD* and *anfD* was observed in  
310 cells grown in V + Fe medium (**Fig. 3B**). Expression of the *vnf* and *anf* operons in *A. vinelandii*  
311 in the absence of Mo results in the production of either V-nitrogenase or Fe-nitrogenase  
312 depending on V availability, but not both. In contrast, V availability had no effect on V-  
313 nitrogenase or Fe-nitrogenase production in *M. acetivorans*, as each was produced in cells grown  
314 in Mo-depleted medium (**Fig. 5**). Notably, VnfH and AnfH are identical in amino acid sequence,  
315 indicating a single dinitrogenase reductase (VnfH/AnfH) can support the *in vivo* activities of  
316 separate dinitrogenases (VnfDGK and AnfDGK). While the expression results cannot distinguish  
317 which nitrogenase is active/functional, the growth profiles are consistent with the more-efficient  
318 V-nitrogenase active in cells grown in V + Fe medium and the less-efficient Fe-nitrogenase  
319 active in cells grown in Fe-only medium (**Fig. 2**).

320       Production of both V-nitrogenase and Fe-nitrogenase in *M. acetivorans* clearly requires  
321 fixed N depletion since neither VnfD nor AnfD were detected by immunoblot in lysate from  
322 cells grown with NH<sub>4</sub>Cl regardless of Mo availability. Regulation of V-nitrogenase and Fe-  
323 nitrogenase expression in response to fixed N availability does not likely involve direct control  
324 of *vnf* and *anf* transcription since fixed N depletion in the presence of Mo did not alter *anfD*  
325 transcript abundance and only had a modest effect on *vnfD* transcript abundance (**Fig. 3A**). These  
326 results are consistent with the promoter regions of both the *vnf* and *anf* gene clusters lacking the  
327 identified NrpR operator sequence [50]. The promoter regions also lack identified binding sites  
328 for NrpA, an activator of the *nif* operon in *M. mazei*, for which *M. acetivorans* encodes two

329 homologs (MA0545 and MA0546) [51]. Thus, post-transcriptional regulation is likely the  
330 primary mechanism of control of V-nitrogenase and Fe-nitrogenase production in response to  
331 fixed N availability. It is possible sRNA<sub>154</sub>, or another sRNA, is responsive to fixed N depletion  
332 and functions to stabilize *vnf* and *anf* mRNAs, which allows for V-nitrogenase and Fe-  
333 nitrogenase production only when fixed N is depleted.

334 Mo availability is the key factor controlling transcription of both the *vnf* and *anf* gene  
335 clusters in *M. acetivorans*. In non-diazotrophic (e.g., *E. coli*) and diazotrophic bacteria, the  
336 molybdate-responsive transcriptional regulator ModE controls the expression of the high-affinity  
337 molybdate transporter ModABC as well as Mo-dependent enzymes [52]. In *A. vinelandii*, ModE  
338 indirectly represses expression of both V-nitrogenase and Fe-nitrogenase by directly repressing  
339 the transcription of the genes encoding the regulators VnfA and AnfA. VnfA activates  
340 transcription of the *vnf* operon and AnfA activates transcription of the *anf* operon in *A. vinelandii*  
341 [52]. The genome of *M. acetivorans* encodes several homologs of ModABC (MA0325-27,  
342 MA1235-37, and MA2280-82), including additional homologs of ModBC (MA3902-03)  
343 downstream of the *nif* operon. *M. acetivorans* contains a ModE homolog (MA0283) but lacks  
344 homologs to VnfA and AnfA. Potential ModE-binding sites are located upstream of *vnfH* and  
345 *anfI<sub>1</sub>*, the first genes in the *vnf* and *anf* gene clusters [53]. Therefore, it is highly plausible that  
346 ModE is responsible for repressing transcription of *vnf* and *anf* when sufficient Mo is available to  
347 support Mo-nitrogenase activity. Depletion of Mo (corepressor) likely results in removal of  
348 DNA-bound ModE and de-repression of transcription of the *vnf* and *anf* gene clusters, leading to  
349 the simultaneous production of V-nitrogenase and Fe-nitrogenase in *M. acetivorans*. The results  
350 are consistent with this regulatory mechanism. Interestingly, the starter inoculum used in all  
351 expression studies was maintained in Mo-deplete medium, which should result in an increase in



352 *vnf* and *anf* transcription even during growth with NH<sub>4</sub>Cl (**Fig. 4**). As such, the starter inoculum  
353 should be primed to use the alternative nitrogenases once fixed N is depleted, yet there was a  
354 much longer lag period before the onset of growth in Mo-deplete medium compared to the onset  
355 of growth in Mo-deplete medium with added Mo (**Table 2 and Fig. 2**). This result indicates that  
356 there are likely other unknown regulatory factors involved in controlling the production of V-  
357 nitrogenase and Fe-nitrogenase in response to fixed N and Mo depletion.

358         The simultaneous production of all three nitrogenases in *M. acetivorans* during  
359 diazotrophy in Mo-deplete medium raises interesting questions. Why would *M. acetivorans*  
360 continue to produce Mo-nitrogenase under conditions when the enzyme is likely not functional?  
361 One plausible explanation is that because the energy conservation (i.e., ATP generation) during  
362 methanogenesis by *M. acetivorans* is significantly lower even during optimal conditions  
363 compared to studied diazotrophic bacteria [54], that *M. acetivorans* continues to produce Mo-  
364 nitrogenase when fixed N is limiting regardless of Mo availability to be poised to use the most  
365 efficient nitrogenase. However, we cannot rule out that a small amount of residual Mo is present  
366 in the Mo-deplete medium that maintains expression of Mo-nitrogenase. But it is unlikely that  
367 this is the case since both V-nitrogenase and Fe-nitrogenase are produced in Mo-deplete  
368 medium, indicating Mo removal is sufficient to induce expression of the less efficient  
369 nitrogenases. Moreover, *M. acetivorans* failed to grow for more than one day in Mo-deplete  
370 medium after residual fixed N was depleted, consistent with insufficient Mo to support Mo-  
371 nitrogenase activity.

372         Another plausible explanation for the continued production of Mo-nitrogenase in Mo-  
373 deplete medium is that Mo-nitrogenase proteins are required for the formation of functional V-  
374 nitrogenase and Fe-nitrogenase. NifH, in addition to providing electrons to NifDK during N<sub>2</sub>

375 reduction, serves multiple roles in nitrogenase maturation in bacteria. For example, NifH is  
376 involved in the synthesis of the complex metalloclusters within NifDK (e.g., P-cluster) [3, 12,  
377 55]. Therefore, NifH could be required for metallocluster synthesis in VnfDGK and AnfdGK.  
378 Although VnfEN scaffold proteins are encoded in the *vnf* gene cluster, it is also possible NifEN  
379 is needed for metallocluster synthesis in VnfDGK and/or AnfdGK. Alternatively, inactive  
380 NifDK may serve a regulatory role in controlling the production of active V-nitrogenase and Fe-  
381 nitrogenase.

382         Finally, the simultaneous production of all three nitrogenases under Mo-deplete  
383 conditions begs the question, which nitrogenase(s) are functional? Although only NifD, VnfD,  
384 and Anfd were detected in cells growing in Mo-deplete medium, it is likely that NifDK,  
385 VnfDGK, and AnfdGK complexes are present since NifD is unstable in the absence of NifK  
386 [56]. Therefore, metal-dependent regulation of metallocluster insertion into NifDK, VnfDGK,  
387 and AnfdGK may control which nitrogenase is active. NifDK likely lacks FeMo-cofactor when  
388 produced in cells growing in Mo-deplete medium, while VnfDGK likely lacks FeV-cofactor  
389 when produced in the absence of V. AnfdGK could contain the FeFe-cofactor cluster regardless  
390 of the presence of V and always be active in cells grown in Mo-deplete medium. Moreover, the  
391 formation of hybrid nitrogenases is possible, as both VnfDGK and AnfdGK can incorporate the  
392 FeMo-cofactor resulting in a functional hybrid nitrogenase [57, 58]. It is unlikely that NifDK can  
393 incorporate the FeV-cofactor or FeFe-cofactor, although this cannot be ruled out. Importantly,  
394 mutant analysis using the CRISPR-Cas9 and CRISPRi-dCas9 systems [39, 41] can help address  
395 many of these questions. Overall, the results from this study highlight the utility of *M.*  
396 *acetivorans* as a model to understand the regulation, maturation, and activity of the three forms  
397 of nitrogenase in methanogens.

398

## 399 **Acknowledgments**

400 We thank Tom Deere for helpful discussions and assistance with gas chromatography. This work  
401 was supported in part by DOE Biosciences grant number DE-SC0019226 (DJL), NSF grant  
402 number MCB1817819 (DJL), NSF Graduate Research Fellowship under grant number 1842401  
403 (MC), and the Arkansas Biosciences Institute (DJL), the major research component of the  
404 Arkansas Tobacco Settlement Proceeds Act of 2000.

405

## 406 **MATERIALS AND METHODS**

407 ***M. acetivorans* strains and growth.** *M. acetivorans* strain WWM73, a pseudo-wild type strain  
408 used for genetic manipulation [40], was used for all experiments. Anoxic high-salt (HS) medium  
409 was prepared as previously described with some modifications [59]. To prepare Mo-deplete HS  
410 medium, all glassware was washed twice with 1 M HCl, once with 1 M H<sub>2</sub>SO<sub>4</sub>, and then rinsed  
411 with ultrapure water to remove any residual molybdate prior to use. NH<sub>4</sub>Cl and molybdate were  
412 omitted and the HS medium was reduced with 1.5 mM DTT. Methanol, NH<sub>4</sub>Cl, sodium sulfide  
413 (Na<sub>2</sub>S), sodium molybdate (Na<sub>2</sub>MoO<sub>4</sub>), and sodium vanadate (Na<sub>3</sub>VO<sub>4</sub>) were added from anoxic  
414 sterile stocks using sterile syringes prior to inoculation. *M. acetivorans* strain WWM73 was  
415 grown in Balch tubes containing 10 ml of HS medium with 125 mM methanol and 0.025 % Na<sub>2</sub>S  
416 (w/v). Molybdate (1 μM), vanadate (1 μM), and NH<sub>4</sub>Cl (18 mM) were added to cultures as  
417 indicated. *M. acetivorans* strain WWM73 was grown for more than 100 generations in Mo-  
418 depleted HS medium containing methanol and NH<sub>4</sub>Cl prior to the growth experiments. Growth  
419 was measured by monitoring optical density at 600 nm (OD<sub>600</sub>) using a spectrophotometer. Cell

420 density was determined from OD<sub>600</sub> using a standard curve generated by direct cell counts with a  
421 hemocytometer.

422

423 **Quantitative PCR analysis of gene expression.** *M. acetivorans* cells were harvested during  
424 mid-log phase (0.3-0.4 OD<sub>600</sub>) by anaerobic centrifugation of 4-8 mL of culture. Cell pellets  
425 were resuspended in 1 mL Trizol and frozen at -80 °C. RNA was extracted using the Zymo  
426 Direct-zol Miniprep kit (#R2052) and further purified using the Invitrogen DNA-free DNA  
427 Removal Kit (#AM1906). cDNA was generated using the Bio-Rad iScript Select cDNA  
428 Synthesis Kit (#1708896). qPCR primers were designed using Geneious Prime (Supplemental  
429 Table 1). qPCR of three biological replicates and two technical replicates was performed with  
430 the SsoAdvanced Universal SYBR Green Supermix (Bio-Rad, #1725271). Relative  
431 quantification was determined using the  $2^{-\Delta\Delta Cq}$  method.

432

433 **Western blot analysis.** Separate custom polyclonal antibodies specific for *M. acetivorans* NifD,  
434 VnfD, or AnfD were generated using the PolyExpress Silver package (two epitopes) from  
435 Genscript. Specificity of the antibodies was confirmed using recombinant NifD, VnfD, and  
436 AnfD expressed in *E. coli* (data not shown). *M. acetivorans* cells were harvested during mid-log  
437 phase (0.3-0.4 OD<sub>600</sub>) by aerobic centrifugation (8500 x g for 10 minutes at 4°C) of 6 mL of  
438 culture. The cell pellet was resuspended in 50 mM Tris, 150 mM NaCl pH 7.2 with 1 mM PMSF  
439 and 1 mM benzamidine, normalized based on OD<sub>600</sub>, and frozen at -80°C. Whole cell lysate was  
440 generated by five freeze/thaw cycles and a one hour DNase (5 µg) treatment at 37°C. Protein  
441 concentration was determined using the Bradford assay. After blocking for one hour in TBST  
442 (20 mM Tris, 150 mM NaCl, 0.1% Tween pH 7.6) with 5% milk, membranes were incubated for

443 18 hours with the primary antibodies specific for NifD, VnfD, or AnfD, then washed three times  
444 with TBST. Membranes were then incubated with an HRP-conjugated secondary antibody  
445 (Promega) for one hour, followed by three washes with TBST. Finally, membranes were  
446 visualized using an enhanced chemiluminescent reagent (Thermo Scientific) and an Alpha  
447 Innotech imaging system.

448

449 **Methane determination by gas chromatography.** After the cessation of growth, the total  
450 volume of gas produced by each culture was measured using a glass syringe, which also  
451 normalized the pressure to 1 atm. The amount of CH<sub>4</sub> produced was determined by injection of  
452 50 µl of headspace gas into a Shimadzu Nexis GC-2030 gas chromatograph fitted with a Rt-Q-  
453 BOND fused silica PLOT column with a 0.32 mm internal diameter, a 30 m length, and a 10.00  
454 µm film thickness (Restek, VWR #89166-308) and BID detector. The sample split ratio was  
455 42.6, and the carrier gas was helium at 4.44 mL/min. The injection port temperature was 100 °C,  
456 column temperature 27 °C, and BID temperature 220 °C. Peak integration was performed using  
457 Shimadzu LabSolutions software and moles of CH<sub>4</sub> determined using methane standards.

458 **Data availability:** The raw data from growth studies and qPCR will be available upon request.

## 459 References

- 460 1. Fowler, D., Coyle, M., Skiba, U., Sutton, M. A., Cape, J. N., Reis, S., Sheppard, L. J.,  
461 Jenkins, A., Grizzetti, B., Galloway, J. N., Vitousek, P., Leach, A., Bouwman, A. F., Butterbach-  
462 Bahl, K., Dentener, F., Stevenson, D., Amann, M. & Voss, M. (2013) The global nitrogen cycle  
463 in the twenty-first century, *Philos Trans R Soc Lond B Biol Sci.* **368**, 20130164.
- 464 2. Stein, L. Y. & Klotz, M. G. (2016) The nitrogen cycle, *Current biology : CB.* **26**, R94-8.
- 465 3. Rubio, L. M. & Ludden, P. W. (2008) Biosynthesis of the iron-molybdenum cofactor of  
466 nitrogenase, *Annu Rev Microbiol.* **62**, 93-111.
- 467 4. Dixon, R. & Kahn, D. (2004) Genetic regulation of biological nitrogen fixation, *Nat Rev*  
468 *Microbiol.* **2**, 621-31.
- 469 5. Dos Santos, P. C., Fang, Z., Mason, S. W., Setubal, J. C. & Dixon, R. (2012) Distribution of  
470 nitrogen fixation and nitrogenase-like sequences amongst microbial genomes, *BMC Genomics.*  
471 **13**, 162.
- 472 6. Burris, R. H. (1991) Nitrogenases, *J Biol Chem.* **266**, 9339-42.
- 473 7. Peters, J. W., Fisher, K. & Dean, D. R. (1995) Nitrogenase structure and function: a  
474 biochemical-genetic perspective, *Annu Rev Microbiol.* **49**, 335-66.
- 475 8. Dingler, C., Kuhla, J., Wassink, H. & Oelze, J. (1988) Levels and activities of nitrogenase  
476 proteins in *Azotobacter vinelandii* grown at different dissolved oxygen concentrations, *J*  
477 *Bacteriol.* **170**, 2148-52.
- 478 9. Eady, R. R. (1996) Structure-Function Relationships of Alternative Nitrogenases, *Chem Rev.*  
479 **96**, 3013-3030.
- 480 10. Harwood, C. S. (2020) Iron-Only and Vanadium Nitrogenases: Fail-Safe Enzymes or  
481 Something More?, *Annu Rev Microbiol.* **74**, 247-266.
- 482 11. Hu, Y. & Ribbe, M. W. (2015) Nitrogenase and homologs, *J Biol Inorg Chem.* **20**, 435-45.
- 483 12. Hu, Y. & Ribbe, M. W. (2016) Biosynthesis of the Metalloclusters of Nitrogenases, *Annu*  
484 *Rev Biochem.* **85**, 455-83.
- 485 13. Waugh, S. I., Paulsen, D. M., Mylona, P. V., Maynard, R. H., Premakumar, R. & Bishop, P.  
486 E. (1995) The genes encoding the delta subunits of dinitrogenases 2 and 3 are required for mo-  
487 independent diazotrophic growth by *Azotobacter vinelandii*, *J Bacteriol.* **177**, 1505-10.
- 488 14. Harris, D. F., Lukoyanov, D. A., Kallas, H., Trncik, C., Yang, Z. Y., Compton, P., Kelleher,  
489 N., Einsle, O., Dean, D. R., Hoffman, B. M. & Seefeldt, L. C. (2019) Mo-, V-, and Fe-  
490 Nitrogenases Use a Universal Eight-Electron Reductive-Elimination Mechanism To Achieve N<sub>2</sub>  
491 Reduction, *Biochemistry.* **58**, 3293-3301.
- 492 15. Eady, R. R., Robson, R. L., Richardson, T. H., Miller, R. W. & Hawkins, M. (1987) The  
493 vanadium nitrogenase of *Azotobacter chroococcum*. Purification and properties of the VFe  
494 protein, *Biochem J.* **244**, 197-207.
- 495 16. Hamilton, T. L., Ludwig, M., Dixon, R., Boyd, E. S., Dos Santos, P. C., Setubal, J. C.,  
496 Bryant, D. A., Dean, D. R. & Peters, J. W. (2011) Transcriptional profiling of nitrogen fixation  
497 in *Azotobacter vinelandii*, *J Bacteriol.* **193**, 4477-86.
- 498 17. McKinlay, J. B. & Harwood, C. S. (2010) Photobiological production of hydrogen gas as a  
499 biofuel, *Curr Opin Biotechnol.* **21**, 244-51.
- 500 18. McKinlay, J. B. & Harwood, C. S. (2011) Calvin cycle flux, pathway constraints, and  
501 substrate oxidation state together determine the H<sub>2</sub> biofuel yield in photoheterotrophic bacteria,  
502 *mBio.* **2**.

- 503 19. Postgate, J. R. (1982) Biological Nitrogen-Fixation - Fundamentals, *Philos T Roy Soc B*.  
504 **296**, 375-385.
- 505 20. Dilworth, M. J., Eady, R. R. & Eldridge, M. E. (1988) The vanadium nitrogenase of  
506 *Azotobacter chroococcum*. Reduction of acetylene and ethylene to ethane, *Biochem J*. **249**, 745-  
507 51.
- 508 21. Hu, Y., Lee, C. C. & Ribbe, M. W. (2011) Extending the carbon chain: hydrocarbon  
509 formation catalyzed by vanadium/molybdenum nitrogenases, *Science*. **333**, 753-5.
- 510 22. Seefeldt, L. C., Yang, Z. Y., Duval, S. & Dean, D. R. (2013) Nitrogenase reduction of  
511 carbon-containing compounds, *Biochimica et biophysica acta*. **1827**, 1102-11.
- 512 23. Zheng, Y., Harris, D. F., Yu, Z., Fu, Y., Poudel, S., Ledbetter, R. N., Fixen, K. R., Yang, Z.  
513 Y., Boyd, E. S., Lidstrom, M. E., Seefeldt, L. C. & Harwood, C. S. (2018) A pathway for  
514 biological methane production using bacterial iron-only nitrogenase, *Nature microbiology*. **3**,  
515 281-286.
- 516 24. Mus, F., Alleman, A. B., Pence, N., Seefeldt, L. C. & Peters, J. W. (2018) Exploring the  
517 alternatives of biological nitrogen fixation, *Metallomics : integrated biometal science*. **10**, 523-  
518 538.
- 519 25. Mus, F., Colman, D. R., Peters, J. W. & Boyd, E. S. (2019) Geobiological feedbacks,  
520 oxygen, and the evolution of nitrogenase, *Free radical biology & medicine*. **140**, 250-259.
- 521 26. Kessler, P. S. & Leigh, J. A. (1999) Genetics of nitrogen regulation in *Methanococcus*  
522 *maripaludis*, *Genetics*. **152**, 1343-51.
- 523 27. Kessler, P. S., McLarnan, J. & Leigh, J. A. (1997) Nitrogenase phylogeny and the  
524 molybdenum dependence of nitrogen fixation in *Methanococcus maripaludis*, *J Bacteriol*. **179**,  
525 541-3.
- 526 28. Thauer, R. K., Kaster, A. K., Seedorf, H., Buckel, W. & Hedderich, R. (2008) Methanogenic  
527 archaea: ecologically relevant differences in energy conservation, *Nat Rev Microbiol*. **6**, 579-91.
- 528 29. Hendrickson, E. L., Kaul, R., Zhou, Y., Bovee, D., Chapman, P., Chung, J., Conway de  
529 Macario, E., Dodsworth, J. A., Gillett, W., Graham, D. E., Hackett, M., Haydock, A. K., Kang,  
530 A., Land, M. L., Levy, R., Lie, T. J., Major, T. A., Moore, B. C., Porat, I., Palmeiri, A., Rouse,  
531 G., Saenphimmachak, C., Soll, D., Van Dien, S., Wang, T., Whitman, W. B., Xia, Q., Zhang, Y.,  
532 Larimer, F. W., Olson, M. V. & Leigh, J. A. (2004) Complete genome sequence of the  
533 genetically tractable hydrogenotrophic methanogen *Methanococcus maripaludis*, *J Bacteriol*.  
534 **186**, 6956-69.
- 535 30. Ehlers, C., Veit, K., Gottschalk, G. & Schmitz, R. A. (2002) Functional organization of a  
536 single *nif* cluster in the mesophilic archaeon *Methanosarcina mazei* strain Go1, *Archaea*. **1**, 143-  
537 50.
- 538 31. Chien, Y. T., Auerbuch, V., Brabban, A. D. & Zinder, S. H. (2000) Analysis of genes  
539 encoding an alternative nitrogenase in the archaeon *Methanosarcina barkeri* 227, *J Bacteriol*.  
540 **182**, 3247-53.
- 541 32. Lobo, A. L. & Zinder, S. H. (1988) Diazotrophy and Nitrogenase Activity in the  
542 Archaeobacterium *Methanosarcina barkeri* 227, *Appl Environ Microbiol*. **54**, 1656-61.
- 543 33. Lobo, A. L. & Zinder, S. H. (1990) Nitrogenase in the archaeobacterium *Methanosarcina*  
544 *barkeri* 227, *J Bacteriol*. **172**, 6789-96.
- 545 34. Leigh, J. A. (2000) Nitrogen fixation in methanogens: the archaeal perspective, *Current*  
546 *issues in molecular biology*. **2**, 125-31.
- 547 35. Leigh, J. A. & Dodsworth, J. A. (2007) Nitrogen regulation in bacteria and archaea, *Annu*  
548 *Rev Microbiol*. **61**, 349-77.

- 549 36. Prasse, D., Forstner, K. U., Jager, D., Backofen, R. & Schmitz, R. A. (2017) sRNA154 a  
550 newly identified regulator of nitrogen fixation in *Methanosarcina mazei* strain Go1, *RNA*  
551 *biology*. **14**, 1544-1558.
- 552 37. Buddeweg, A., Sharma, K., Urlaub, H. & Schmitz, R. A. (2018) sRNA41 affects ribosome  
553 binding sites within polycistronic mRNAs in *Methanosarcina mazei* Go1, *Mol Microbiol*. **107**,  
554 595-609.
- 555 38. Galagan, J. E., Nusbaum, C., Roy, A., Endrizzi, M. G., Macdonald, P., FitzHugh, W., Calvo,  
556 S., Engels, R., Smirnov, S., Atnoor, D., Brown, A., Allen, N., Naylor, J., Stange-Thomann, N.,  
557 DeArellano, K., Johnson, R., Linton, L., McEwan, P., McKernan, K., Talamas, J., Tirrell, A., Ye,  
558 W., Zimmer, A., Barber, R. D., Cann, I., Graham, D. E., Grahame, D. A., Guss, A. M.,  
559 Hedderich, R., Ingram-Smith, C., Kuettner, H. C., Krzycki, J. A., Leigh, J. A., Li, W., Liu, J.,  
560 Mukhopadhyay, B., Reeve, J. N., Smith, K., Springer, T. A., Umayam, L. A., White, O., White,  
561 R. H., Conway de Macario, E., Ferry, J. G., Jarrell, K. F., Jing, H., Macario, A. J., Paulsen, I.,  
562 Pritchett, M., Sowers, K. R., Swanson, R. V., Zinder, S. H., Lander, E., Metcalf, W. W. &  
563 Birren, B. (2002) The genome of *Methanosarcina acetivorans* reveals extensive metabolic and  
564 physiological diversity, *Genome Res*. **12**, 532-42.
- 565 39. Nayak, D. D. & Metcalf, W. W. (2017) Cas9-mediated genome editing in the methanogenic  
566 archaeon *Methanosarcina acetivorans*, *Proc Natl Acad Sci U S A*. **114**, 2976-2981.
- 567 40. Guss, A. M., Rother, M., Zhang, J. K., Kulkarni, G. & Metcalf, W. W. (2008) New methods  
568 for tightly regulated gene expression and highly efficient chromosomal integration of cloned  
569 genes for *Methanosarcina* species, *Archaea*. **2**, 193-203.
- 570 41. Dhamad, A. E. & Lessner, D. J. (2020) A CRISPRi-dCas9 System for Archaea and Its Use  
571 To Examine Gene Function during Nitrogen Fixation by *Methanosarcina acetivorans*, *Appl*  
572 *Environ Microbiol*. **86**.
- 573 42. Kessler, P. S., Blank, C. & Leigh, J. A. (1998) The *nif* gene operon of the methanogenic  
574 archaeon *Methanococcus maripaludis*, *J Bacteriol*. **180**, 1504-11.
- 575 43. Chien, Y. T. & Zinder, S. H. (1996) Cloning, functional organization, transcript studies, and  
576 phylogenetic analysis of the complete nitrogenase structural genes (*nifHDK2*) and associated  
577 genes in the archaeon *Methanosarcina barkeri* 227, *J Bacteriol*. **178**, 143-8.
- 578 44. Kessler, P. S., Daniel, C. & Leigh, J. A. (2001) Ammonia switch-off of nitrogen fixation in  
579 the methanogenic archaeon *Methanococcus maripaludis*: mechanistic features and requirement  
580 for the novel GlnB homologues, NifI(1) and NifI(2), *J Bacteriol*. **183**, 882-9.
- 581 45. Sicking, C., Bruschi, M., Lindackers, A., Riedel, K. U., Schubert, B., Isakovic, N., Krall, C.,  
582 Klipp, W., Drepper, T., Schneider, K. & Masepohl, B. (2005) Identification of two new genes  
583 involved in diazotrophic growth via the alternative Fe-only nitrogenase in the phototrophic  
584 purple bacterium *Rhodobacter capsulatus*, *J Bacteriol*. **187**, 92-8.
- 585 46. Varghese, F., Kabasakal, B. V., Cotton, C. A. R., Schumacher, J., Rutherford, A. W.,  
586 Fantuzzi, A. & Murray, J. W. (2019) A low-potential terminal oxidase associated with the iron-  
587 only nitrogenase from the nitrogen-fixing bacterium *Azotobacter vinelandii*, *J Biol Chem*. **294**,  
588 9367-9376.
- 589 47. Ferry, J. G. (1999) Enzymology of one-carbon metabolism in methanogenic pathways,  
590 *FEMS microbiology reviews*. **23**, 13-38.
- 591 48. Lie, T. J. & Leigh, J. A. (2002) Regulatory response of *Methanococcus maripaludis* to  
592 alanine, an intermediate nitrogen source, *J Bacteriol*. **184**, 5301-6.



- 593 49. Oda, Y., Samanta, S. K., Rey, F. E., Wu, L., Liu, X., Yan, T., Zhou, J. & Harwood, C. S.  
594 (2005) Functional genomic analysis of three nitrogenase isozymes in the photosynthetic  
595 bacterium *Rhodospseudomonas palustris*, *J Bacteriol.* **187**, 7784-94.
- 596 50. Lie, T. J., Dodsworth, J. A., Nickle, D. C. & Leigh, J. A. (2007) Diverse homologues of the  
597 archaeal repressor NrpR function similarly in nitrogen regulation, *FEMS Microbiol Lett.* **271**,  
598 281-8.
- 599 51. Weidenbach, K., Ehlers, C. & Schmitz, R. A. (2014) The transcriptional activator NrpA is  
600 crucial for inducing nitrogen fixation in *Methanosarcina mazei* Go1 under nitrogen-limited  
601 conditions, *FEBS J.* **281**, 3507-22.
- 602 52. Demtroder, L., Narberhaus, F. & Masepohl, B. (2019) Coordinated regulation of nitrogen  
603 fixation and molybdate transport by molybdenum, *Mol Microbiol.* **111**, 17-30.
- 604 53. Studholme, D. J. & Pau, R. N. (2003) A DNA element recognised by the molybdenum-  
605 responsive transcription factor ModE is conserved in Proteobacteria, green sulphur bacteria and  
606 Archaea, *BMC Microbiol.* **3**, 24.
- 607 54. Ferry, J. G. (2010) How to make a living by exhaling methane, *Annu Rev Microbiol.* **64**,  
608 453-73.
- 609 55. Rangaraj, P., Shah, V. K. & Ludden, P. W. (1997) ApoNifH functions in iron-molybdenum  
610 cofactor synthesis and apodinitrogenase maturation, *Proc Natl Acad Sci U S A.* **94**, 11250-5.
- 611 56. Li, J. G., Tal, S., Robinson, A. C., Dang, V. & Burgess, B. K. (1990) Analysis of  
612 *Azotobacter vinelandii* strains containing defined deletions in the *nifD* and *nifK* genes, *J*  
613 *Bacteriol.* **172**, 5884-91.
- 614 57. Gollan, U., Schneider, K., Muller, A., Schuddekopf, K. & Klipp, W. (1993) Detection of the  
615 in vivo incorporation of a metal cluster into a protein. The FeMo cofactor is inserted into the  
616 FeFe protein of the alternative nitrogenase of *Rhodobacter capsulatus*, *Eur J Biochem.* **215**, 25-  
617 35.
- 618 58. Rebelein, J. G., Lee, C. C., Newcomb, M., Hu, Y. & Ribbe, M. W. (2018) Characterization  
619 of an M-Cluster-Substituted Nitrogenase VFe Protein, *mBio.* **9**.
- 620 59. Sowers, K. R., Boone, J. E. & Gunsalus, R. P. (1993) Disaggregation of *Methanosarcina*  
621 spp. and growth as single cells at elevated osmolarity, *Appl Environ Microbiol.* **59**, 3832-9.

622

623  
624

**Table 1. Nitrogenase distribution among genome-sequence Methanosarcinales.**

| Species                                          | Mo-nitrogenase<br>( <i>nif</i> ) | V-nitrogenase<br>( <i>vnf</i> ) | Fe-nitrogenase<br>( <i>anf</i> ) |
|--------------------------------------------------|----------------------------------|---------------------------------|----------------------------------|
| <i>Methanococcoides burtonii</i> DSM 6242        |                                  |                                 |                                  |
| <i>Methanococcoides methylutens</i> MM1          |                                  |                                 |                                  |
| <i>Methanohalobium evestigatum</i> Z-7303        |                                  |                                 |                                  |
| <i>Methanohalophilus halophilus</i>              |                                  |                                 |                                  |
| <i>Methanohalophilus mahii</i> DSM 5219          |                                  |                                 |                                  |
| <i>Methanolobus psychrophilus</i> R15            | •                                |                                 |                                  |
| <i>Methanolobus zinderi</i>                      | •                                |                                 |                                  |
| <i>Methanomethylovorans hollandica</i> DSM 15978 |                                  |                                 |                                  |
| <i>Methanosaeta harundinacea</i> 6Ac             |                                  |                                 |                                  |
| <i>Methanosalsum zhilinae</i> DSM 4017           |                                  |                                 |                                  |
| <i>Methanosarcina acetivorans</i> C2A            | •                                | •                               | •                                |
| <i>Methanosarcina barkeri</i> 227                | •                                | •                               |                                  |
| <i>Methanosarcina barkeri</i> 3                  | •                                | •                               | •                                |
| <i>Methanosarcina barkeri</i> CM1                | •                                | •                               |                                  |
| <i>Methanosarcina barkeri</i> MS                 | •                                | •                               |                                  |
| <i>Methanosarcina barkeri</i> str. Fusaro        | •                                | •                               | — <sup>a</sup>                   |
| <i>Methanosarcina barkeri</i> str. Wiesmoor      | •                                | •                               | — <sup>a</sup>                   |
| <i>Methanosarcina flavescens</i>                 |                                  |                                 |                                  |
| <i>Methanosarcina horonobensis</i> HB-1          | •                                |                                 |                                  |
| <i>Methanosarcina lacustris</i> Z-7289           |                                  |                                 |                                  |
| <i>Methanosarcina mazei</i> zm-15                | •                                |                                 |                                  |
| <i>Methanosarcina mazei</i> C16                  | •                                |                                 |                                  |
| <i>Methanosarcina mazei</i> Gö1                  | •                                |                                 |                                  |
| <i>Methanosarcina mazei</i> LYC                  | •                                |                                 |                                  |
| <i>Methanosarcina mazei</i> S-6                  | •                                |                                 |                                  |
| <i>Methanosarcina mazei</i> SarPi                | •                                |                                 |                                  |
| <i>Methanosarcina mazei</i> Tuc01                | •                                |                                 |                                  |
| <i>Methanosarcina mazei</i> WWM610               | •                                |                                 |                                  |
| <i>Methanosarcina siciliae</i> C2J               | •                                | •                               | •                                |
| <i>Methanosarcina siciliae</i> HI350             | •                                | •                               |                                  |
| <i>Methanosarcina siciliae</i> T4/M              | •                                | •                               | •                                |
| <i>Methanosarcina</i> sp. Kolksee                | •                                | •                               |                                  |
| <i>Methanosarcina</i> sp. MTP4                   |                                  |                                 |                                  |
| <i>Methanosarcina</i> sp. WH1                    | •                                |                                 |                                  |
| <i>Methanosarcina</i> sp. WWM596                 | •                                |                                 |                                  |
| <i>Methanosarcina thermophila</i> MT-1           | — <sup>b</sup>                   |                                 |                                  |
| <i>Methanosarcina thermophila</i> CHTI-55        |                                  |                                 |                                  |
| <i>Methanosarcina thermophila</i> TM-1           |                                  |                                 |                                  |
| <i>Methanosarcina vacuolata</i> Z-761            | •                                | •                               |                                  |
| <i>Methanotherix soehngenii</i> GP6              | •                                |                                 |                                  |
| <i>Methanotherix thermoacetophila</i> PT         |                                  |                                 |                                  |

625 <sup>a</sup>AnfH is truncated and likely non-functional.

626 <sup>b</sup>Nif-like genes present but not in an operon.

627

628

629

630

631

632 **Table 2. Effect of metal and NH<sub>4</sub>Cl availability on growth of *M. acetivorans* with methanol.**  
633

| Relevant Metals | Nitrogen Source    | Lag time <sup>a</sup><br>(hours) | Generation Time <sup>b</sup><br>(hours) | Cell Yield <sup>b</sup><br>(cells/mL) |
|-----------------|--------------------|----------------------------------|-----------------------------------------|---------------------------------------|
| Mo + Fe         | NH <sub>4</sub> Cl | 30                               | 8.2 ± 0.5                               | 3.02 x 10 <sup>8</sup>                |
|                 | N <sub>2</sub>     | 48                               | 28.5 ± 4                                | 1.92 x 10 <sup>8</sup>                |
| V + Fe          | NH <sub>4</sub> Cl | 30                               | 8.5 ± 0.1                               | 3.08 x 10 <sup>8</sup>                |
|                 | N <sub>2</sub>     | 90                               | 44.5 ± 4.1                              | 1.53 x 10 <sup>8</sup>                |
| Fe only         | NH <sub>4</sub> Cl | 30                               | 8.7 ± 0.1                               | 3.34 x 10 <sup>8</sup>                |
|                 | N <sub>2</sub>     | 96                               | 82 ± 4.1                                | 9.88 x 10 <sup>7</sup>                |

634 <sup>a</sup>Approximate time until the first observed increase in OD<sub>600</sub>.

635 <sup>b</sup>Generation time and cell yield represent the mean ± 1 SD from at least three biological replicates.

636

637

638

639

640 **Table 3. Effect of metal and NH<sub>4</sub>Cl availability on total CH<sub>4</sub> production by *M. acetivorans***  
641 **with methanol.**

| Relevant Metals | Nitrogen Source    | CH <sub>4</sub> Produced (μmol) |
|-----------------|--------------------|---------------------------------|
| Mo + Fe         | NH <sub>4</sub> Cl | 1004 ± 109                      |
|                 | N <sub>2</sub>     | 1092 ± 58                       |
| V + Fe          | NH <sub>4</sub> Cl | 926 ± 193                       |
|                 | N <sub>2</sub>     | 823 ± 24                        |
| Fe only         | NH <sub>4</sub> Cl | 1031 ± 48                       |
|                 | N <sub>2</sub>     | 1079 ± 41                       |

Data represent the mean ± 1 SD from at least three biological replicates.

642

643

644

645 **Figure Legends**

646 **Figure 1.** Arrangement of nitrogenase gene clusters in the genome of *M. acetivorans*. A) *nif*;  
647 Mo-nitrogenase, B) *vnf*; V-nitrogenase, C) *anf*; Fe-nitrogenase. The locus tag is above and the  
648 predicted protein below. Black arrows: nitrogenase subunits, diagonal striped arrows: cofactor  
649 assembly proteins, dotted arrows: regulatory proteins and vertical striped arrows: unknown  
650 function. D) the *vnf* and *anf* gene clusters are divergent in the chromosome as shown.

651 **Figure 2.** Comparison of the growth of *M. acetivorans* in the presence (closed) or absence  
652 (open) of NH<sub>4</sub>Cl in HS medium with Mo + Fe (green squares), V + Fe (blue diamonds), or Fe  
653 alone (red circles). Error bars represent mean  $\pm$  1 SD from at least three biological replicates.

654 **Figure 3.** Effect of fixed N availability on the transcription of the *nif*, *vnf* and *anf* gene clusters in  
655 *M. acetivorans* as determined by qPCR. The relative abundance of *nifD*, *vnfD*, and *anfD*  
656 transcripts in *M. acetivorans* cells grown with NH<sub>4</sub>Cl (normalized to one) were compared to cells  
657 grown without NH<sub>4</sub>Cl. *M. acetivorans* was grown with methanol in HS medium containing A)  
658 Mo + Fe B) V + Fe or C) Fe only. Error bars represent mean  $\pm$  1 SD for two technical replicates  
659 and three biological replicates. \*, P < 0.05; \*\*, P < 0.01; \*\*\*, P < 0.001; \*\*\*\*, P < 0.0001.

660 **Figure 4.** Effect of molybdenum availability on the transcription of the *nif*, *vnf* and *anf* gene  
661 clusters in *M. acetivorans* as determined by qPCR. The relative abundance of A) *nifD*, B) *vnfD*,  
662 and C) *anfD* transcripts in cells grown with molybdenum (normalized to one) were compared to  
663 cells grown without molybdenum. Error bars represent mean  $\pm$  1 SD for two technical replicates  
664 and three biological replicates. \*, P < 0.05; \*\*, P < 0.01; \*\*\*, P < 0.001; \*\*\*\*, P < 0.0001.

665 **Figure 5.** Western blot analysis using NifD-, VnfD-, and AnfD-specific antibodies on lysate  
666 from *M. acetivorans* cells grown with or without NH<sub>4</sub>Cl and the indicated metals.

667

**Fig. 1**

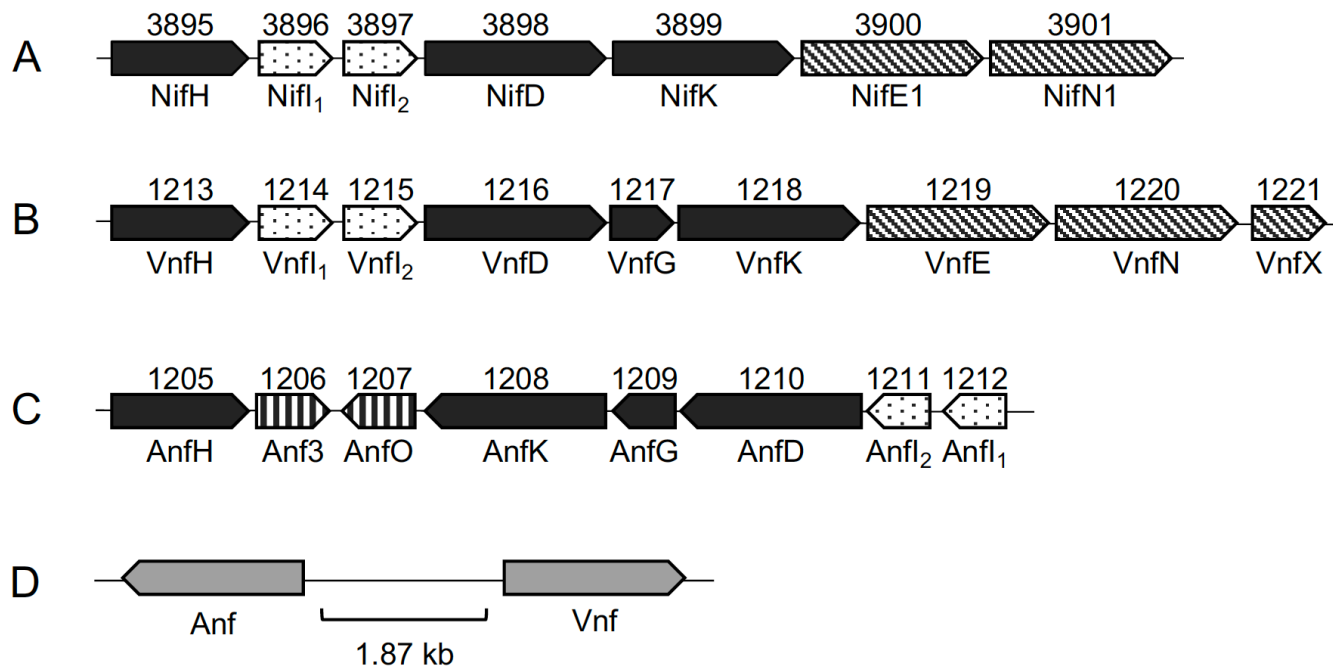

**Fig. 2**

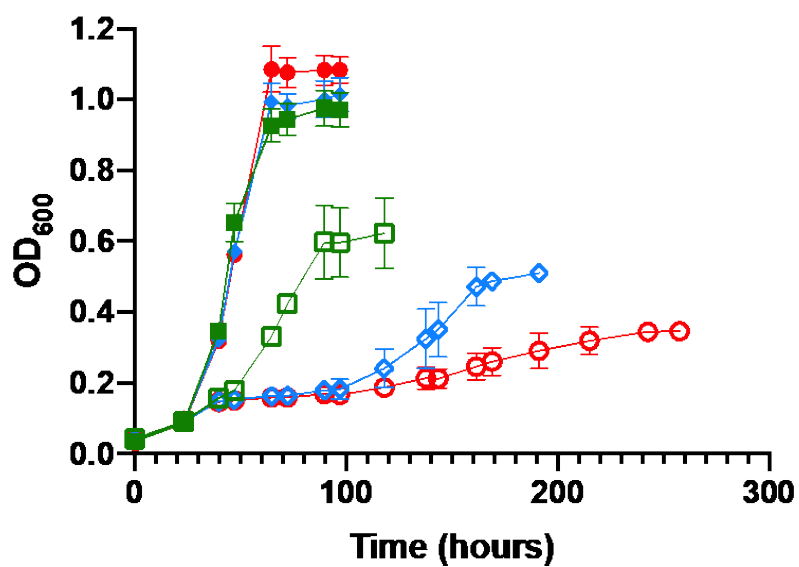

Fig. 3

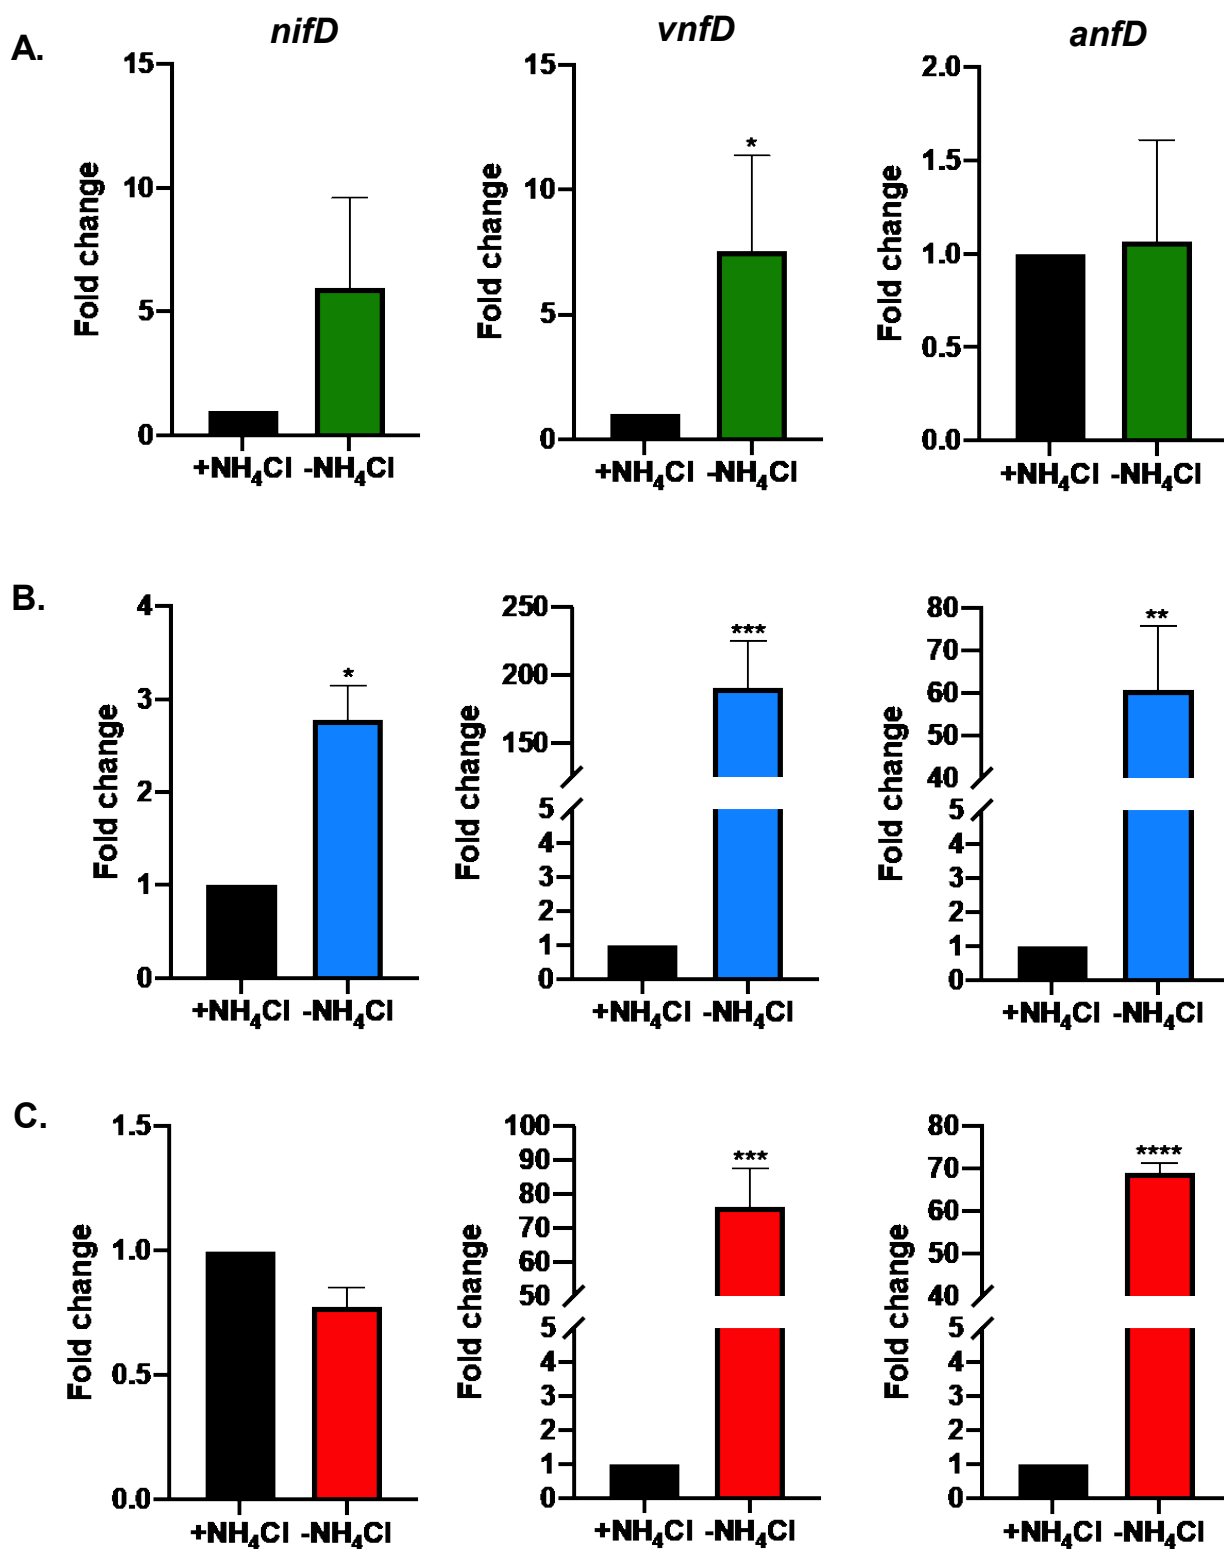



Fig. 4

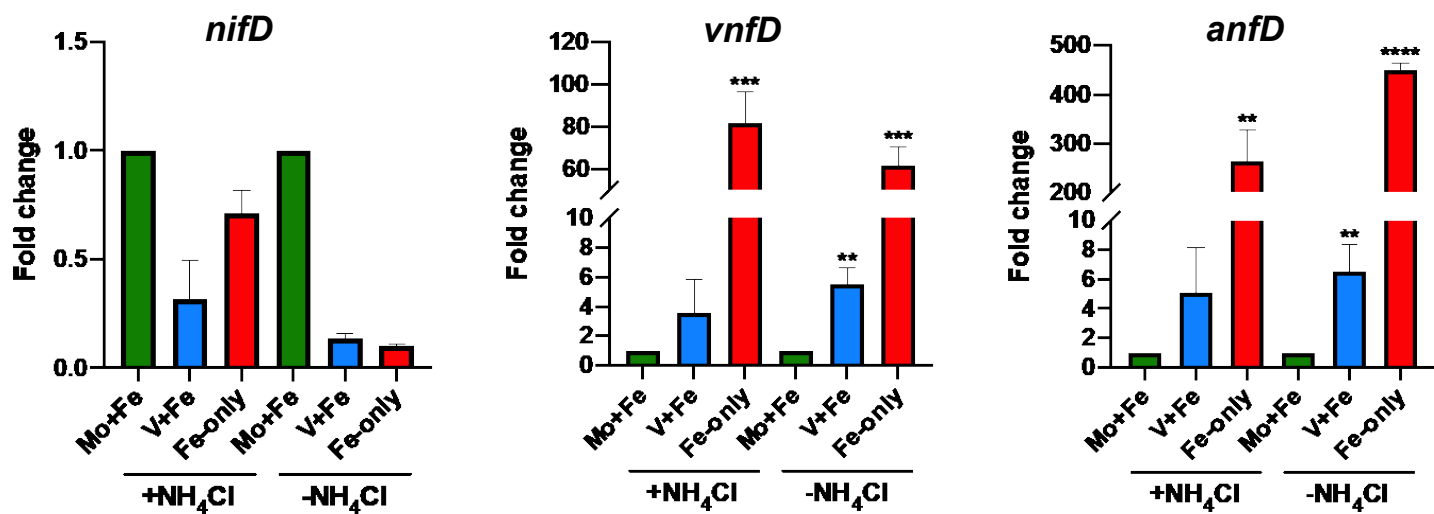

**Fig. 5**

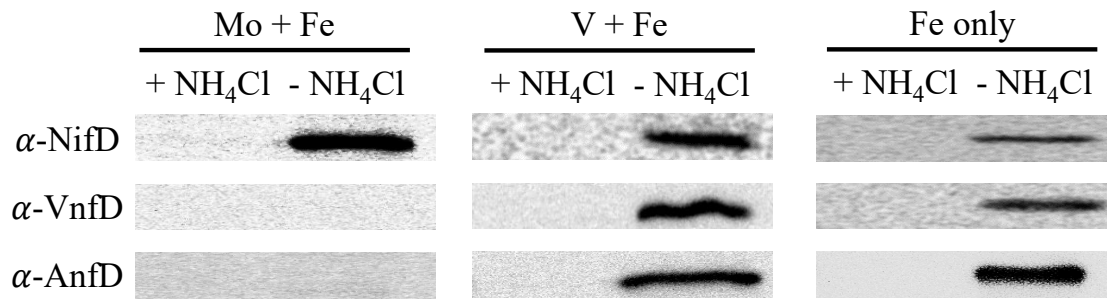

Source: https://www.biorxiv.org/content/10.1101/2021.06.03.447018v1.full.pdf
